# Supplementary material
Source: PubMed Central journal article supplement (PMC2698448)
Supplement: NIHMS5183-supplement-Supplementary_Figure1.pdf [file NIHMS5183-supplement-Supplementary_Figure1.pdf]

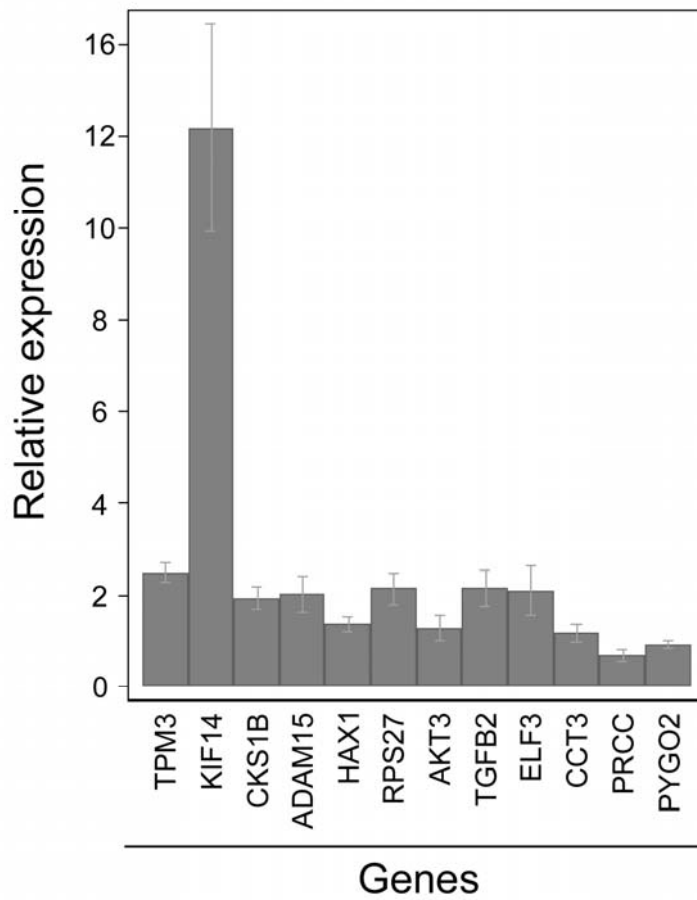

**Supplementary Figure 1.** Expression levels of 12 candidate genes located in the RARs on 1q. Mean RNA expression levels (tumor/normal ratio) of 12 candidate genes were calculated by real-time qRT-PCR in 20 HCCs. cDNA from a non-neoplastic part of liver, which showed no septal fibrosis or liver cirrhosis, was used as normal control. Human *GAPDH* gene was used as an internal control for qRT-PCR. Error bars represent mean  $\pm$  standard error of mean.
